# Supplementary material
Source: PubMed Central journal article supplement (PMC3538330)
Supplement: supp_blood-2012-03-417667_blood-2012-03-417667-1.pdf [file supp_blood-2012-03-417667_blood-2012-03-417667-1.pdf]

**Supplemental Online Table A. Hematologic recovery among first-time NMDP donors who donated between January 2004 and July 2009: 2-sample t-test comparing blood count recovery from baseline to each post-donation time point between bone marrow and PBSC donors**

|                                               | Bone marrow |        |                 | PBSC |         |                  | Difference | 95% C.I.        | p-value |
|-----------------------------------------------|-------------|--------|-----------------|------|---------|------------------|------------|-----------------|---------|
|                                               | N           | Mean   | 95% C.I.        | N    | Mean    | 95% C.I.         |            |                 |         |
| <b>White blood cells (x 10<sup>9</sup>/L)</b> |             |        |                 |      |         |                  |            |                 |         |
| Change from baseline to                       |             |        |                 |      |         |                  |            |                 |         |
| Post-collection                               | 2624        | 3.68   | (3.53,3.82)     | 6711 | 30.18   | (29.95,30.42)    | -26.51     | (-26.78,-26.23) | <0.001  |
| 1 month post-donation                         | 20          | -0.14  | (-0.87,0.60)    | 84   | -0.66   | (-1.00,-0.33)    | 0.53       | (-0.24,1.30)    | 0.176   |
| 1 year post-donation                          | 935         | 0.08   | (-0.02,0.18)    | 2104 | -0.25   | (-0.32,-0.18)    | 0.32       | (0.20,0.44)     | <0.001  |
| 2 years post-donation                         | 541         | 0.09   | (-0.06,0.23)    | 1101 | -0.23   | (-0.33,-0.13)    | 0.31       | (0.14,0.49)     | <0.001  |
| 3 years post-donation                         | 274         | 0.00   | (-0.17,0.17)    | 508  | -0.09   | (-0.24,0.05)     | 0.09       | (-0.13,0.31)    | 0.418   |
| <b>Neutrophils (x 10<sup>9</sup>/L)</b>       |             |        |                 |      |         |                  |            |                 |         |
| Change from baseline to                       |             |        |                 |      |         |                  |            |                 |         |
| Post-collection                               | 2373        | 3.89   | (3.73,4.05)     | 6655 | 28.46   | (28.23,28.69)    | -24.57     | (-24.85,-24.30) | <0.001  |
| 1 month post-donation                         | 20          | -0.33  | (-0.93,0.27)    | 82   | -0.33   | (-0.61,-0.04)    | -0.01      | (-0.64,0.62)    | 0.979   |
| 1 year post-donation                          | 932         | -0.11  | (-0.20,-0.03)   | 2092 | -0.15   | (-0.22,-0.09)    | 0.04       | (-0.06,0.15)    | 0.435   |
| 2 years post-donation                         | 539         | -0.08  | (-0.20,0.05)    | 1098 | -0.16   | (-0.25,-0.08)    | 0.09       | (-0.07,0.24)    | 0.272   |
| 3 years post-donation                         | 273         | -0.08  | (-0.23,0.07)    | 508  | -0.11   | (-0.23,0.02)     | 0.02       | (-0.17,0.22)    | 0.811   |
| <b>Mononuclear cells (x 10<sup>9</sup>/L)</b> |             |        |                 |      |         |                  |            |                 |         |
| Change from baseline to                       |             |        |                 |      |         |                  |            |                 |         |
| Post-collection                               | 2333        | -0.24  | (-0.28,-0.20)   | 6533 | 1.69    | (1.63,1.74)      | -1.93      | (-2.00,-1.86)   | <0.001  |
| 1 month post-donation                         | 20          | 0.20   | (-0.05,0.44)    | 82   | -0.35   | (-0.48,-0.21)    | 0.54       | (0.25,0.84)     | <0.001  |
| 1 year post-donation                          | 925         | 0.20   | (0.16,0.24)     | 2075 | -0.08   | (-0.10,-0.06)    | 0.28       | (0.23,0.32)     | <0.001  |
| 2 years post-donation                         | 538         | 0.18   | (0.13,0.23)     | 1089 | -0.06   | (-0.09,-0.03)    | 0.24       | (0.18,0.30)     | <0.001  |
| 3 years post-donation                         | 274         | 0.09   | (0.04,0.15)     | 506  | 0.02    | (-0.03,0.07)     | 0.07       | (0.00,0.15)     | 0.053   |
| <b>Platelets (x 10<sup>9</sup>/L)</b>         |             |        |                 |      |         |                  |            |                 |         |
| Change from baseline to                       |             |        |                 |      |         |                  |            |                 |         |
| Post-collection                               | 2622        | -41.50 | (-43.05,-39.94) | 6694 | -129.70 | (-130.90,-128.5) | 88.23      | (86.26,90.21)   | <0.001  |
| 1 month post-donation                         | 20          | 12.75  | (-9.09,34.59)   | 83   | -12.83  | (-21.74,-3.92)   | 25.58      | (4.84,46.32)    | 0.016   |
| 1 year post-donation                          | 934         | -3.95  | (-6.36,-1.55)   | 2094 | -7.58   | (-9.17,-5.98)    | 3.62       | (0.74,6.5)      | 0.014   |
| 2 years post-donation                         | 540         | -6.19  | (-9.22,-3.16)   | 1098 | -7.88   | (-10.24,-5.53)   | 1.69       | (-2.14,5.52)    | 0.387   |
| 3 years post-donation                         | 274         | -6.35  | (-10.84,-1.86)  | 503  | -3.99   | (-7.30,-0.68)    | -2.36      | (-7.93,3.21)    | 0.405   |

|                          | Bone marrow |       |               | PBSC |       |               | Difference | 95% C.I.      | p-value |
|--------------------------|-------------|-------|---------------|------|-------|---------------|------------|---------------|---------|
|                          | N           | Mean  | 95% C.I.      | N    | Mean  | 95% C.I.      |            |               |         |
| <b>Hemoglobin (g/dL)</b> |             |       |               |      |       |               |            |               |         |
| Change from baseline to  |             |       |               |      |       |               |            |               |         |
| Post-collection          | 1430        | -3.03 | (-3.11,-2.96) | 6703 | -1.69 | (-1.71,-1.67) | -1.34      | (-1.42,-1.26) | <0.001  |
| 1 month post-donation    | 20          | -0.88 | (-1.15,-0.60) | 84   | -0.64 | (-0.80,-0.48) | -0.23      | (-0.59,0.12)  | 0.192   |
| 1 year post-donation     | 936         | -0.18 | (-0.24,-0.12) | 2103 | -0.21 | (-0.24,-0.17) | 0.03       | (-0.04,0.09)  | 0.476   |
| 2 years post-donation    | 541         | -0.22 | (-0.30,-0.14) | 1101 | -0.23 | (-0.28,-0.18) | 0.01       | (-0.08,0.11)  | 0.782   |
| 3 years post-donation    | 274         | -0.16 | (-0.28,-0.03) | 508  | -0.16 | (-0.24,-0.07) | 0.00       | (-0.14,0.15)  | 0.968   |
